# Supplementary material
Source: PubMed Central journal article supplement (PMC2581553)

## SUPPLEMENTAL DATA

### A NOVEL INTERACTION LINKING THE FAS-II AND PDIM BIOSYNTHETIC PATHWAYS

Nicole A. Kruh,<sup>1,2</sup> Janine G. Borgaro,<sup>2</sup> Béla P. Ruzsicska,<sup>2</sup> Hua Xu<sup>2</sup> and Peter J. Tonge<sup>1,2</sup>

From the Graduate Program in Molecular Genetics and Microbiology<sup>1</sup> and the Institute Department of Chemical Biology & Drug Discovery,<sup>2</sup> Stony Brook University, Stony Brook, NY 11794-3400

Running title: Interaction of KasA and PpsB

Address correspondence to: Peter J. Tonge, Phone: 631-632-7907 Fax: 631-632-7934; E-mail: [peter.tonge@sunysb.edu](mailto:peter.tonge@sunysb.edu)

## SUPPLEMENTAL FIGURES

**Figure S1:** Mass spectrum of B4M-CoA: m/z region 300-1,200. [B4M-CoA + H]<sup>+</sup>, 1045.1 calculated 1044.1 and [B4M-CoA + 2H]<sup>+</sup>, 523.2, calculated 522.1

**Figure S2:** LC/MS of B4M-AcpM. a) Chromatogram of the reaction mixture. Mass spectra of b) The peak at 23.318 and c) The peak at 24.495 over the m/z 300-1,500 region. Giving average mass assignments of [apo-AcpM + H]<sup>+</sup>, 15079.1 calculated, 15078.2 and [B4M-AcpM + H]<sup>+</sup>, 15695.7 calculated, 15695.5 respectively.

### Supplemental Data

**Figure S1**

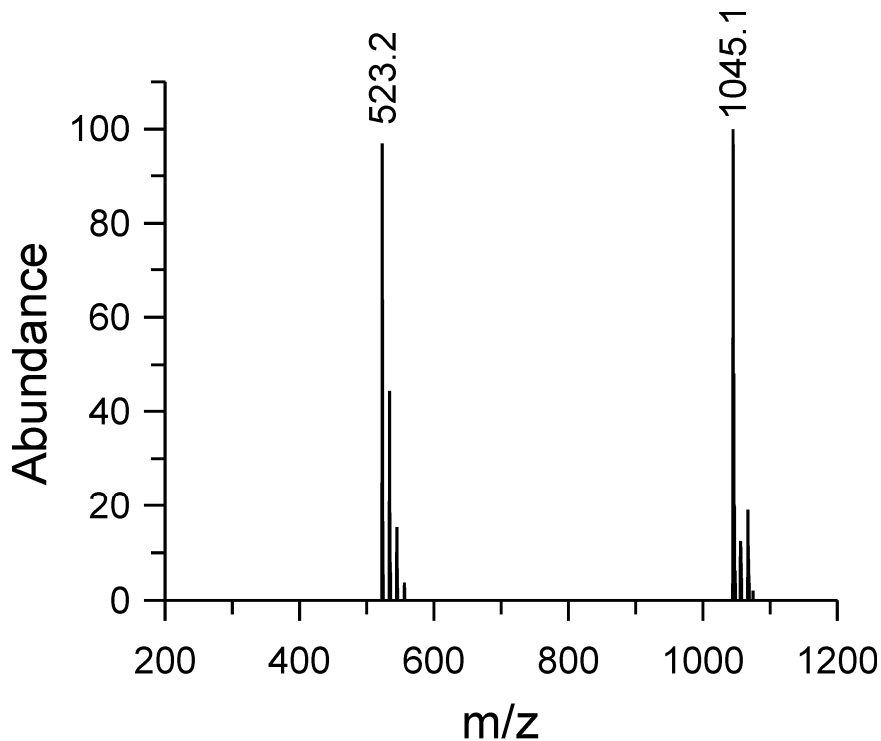

Figure S2

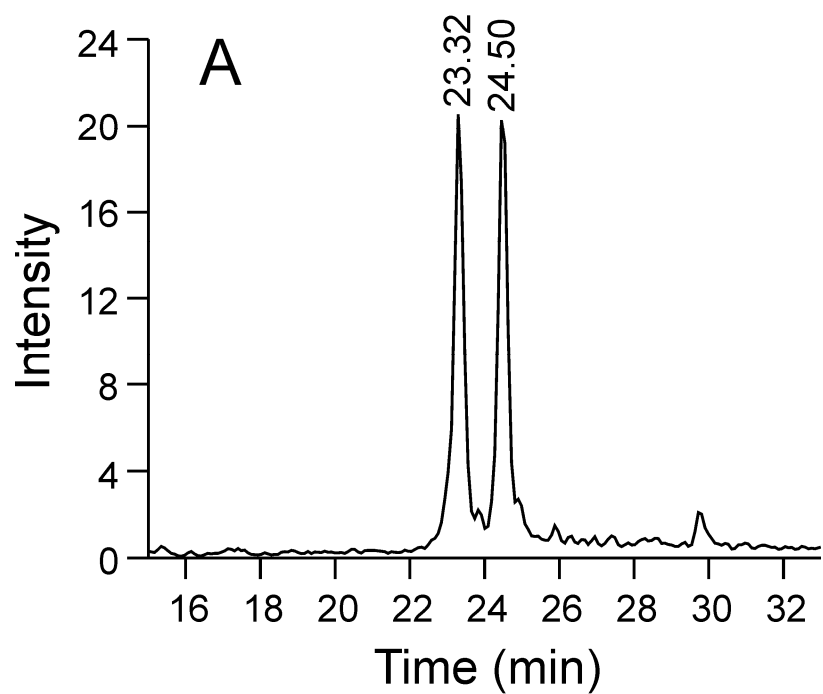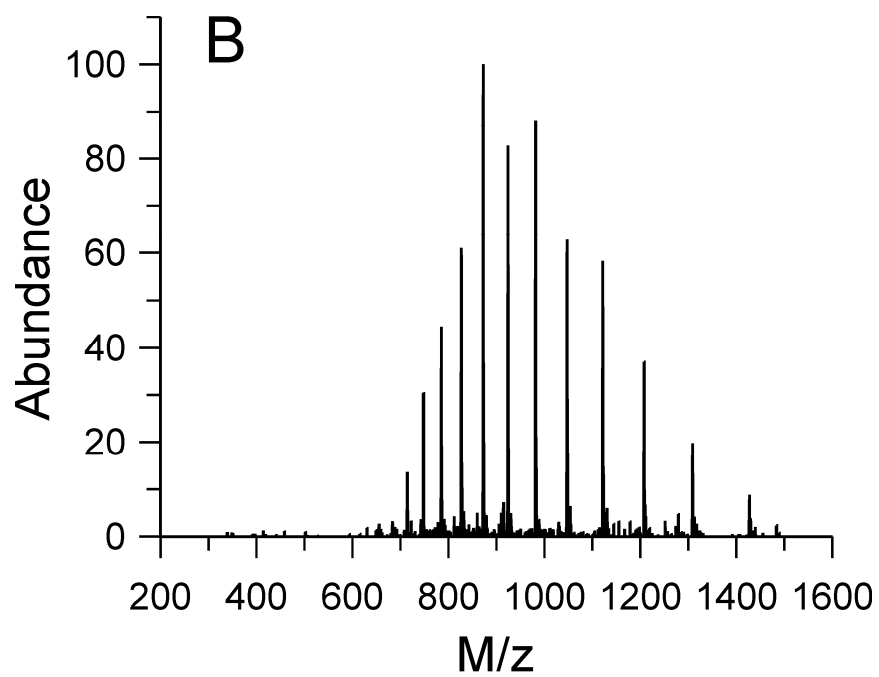

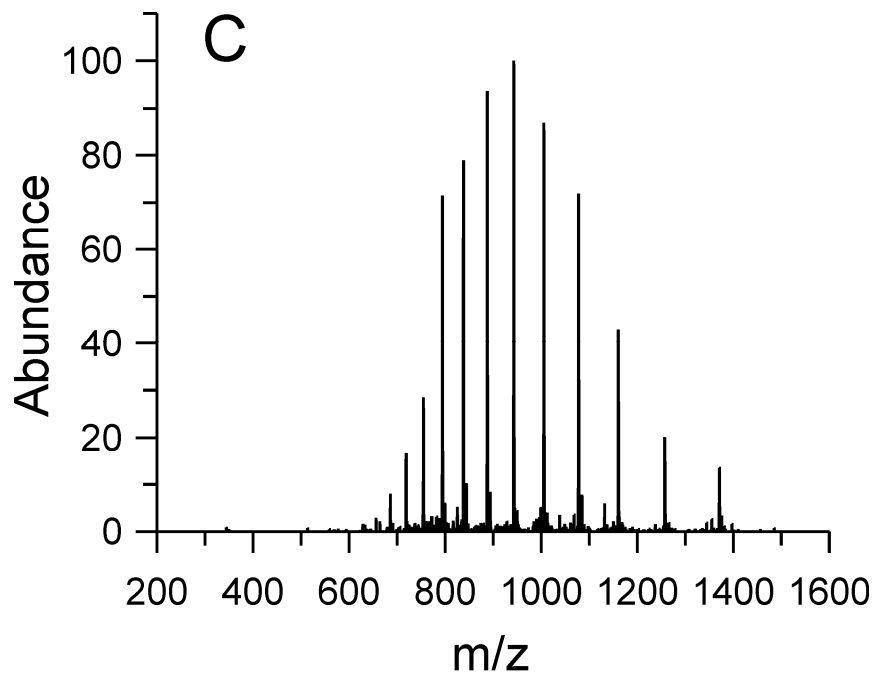

Supplement: M802169200_1.pdf [file M802169200_1.pdf]
